# Supplementary material for: Discovery and optimization of triazine derivatives as ROCK1 inhibitors: molecular docking, molecular dynamics simulations and free energy calculations
Source: Royal Society of Chemistry journal article supplement (doi:10.1039/c2mb25408e), 2012-12-20
Supplement: c2mb25408e.pdf [file c2mb25408e.pdf]

## Supporting Materials

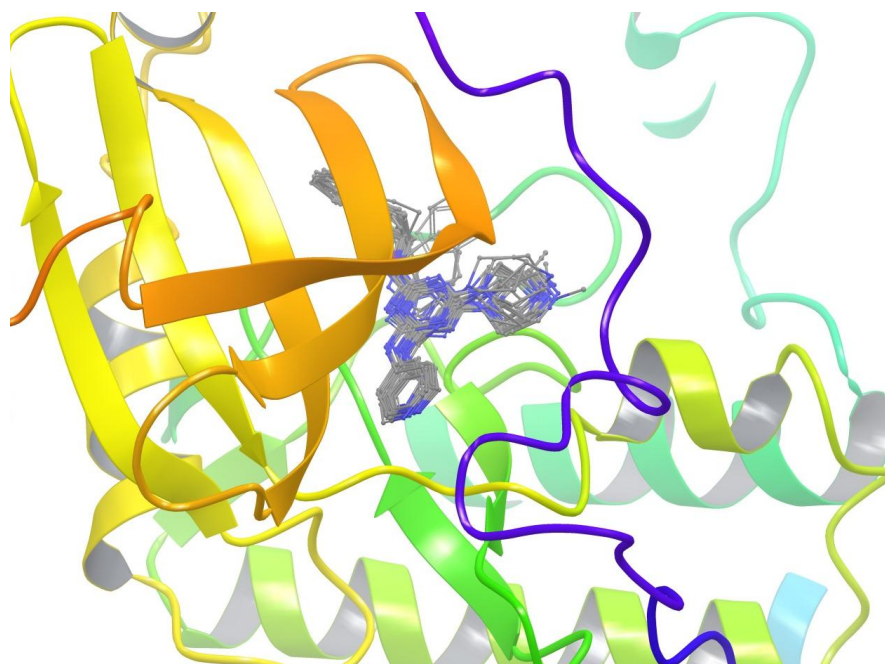

Figure S1. The alignments of 21 docked structures in the binding site of ROCK1.

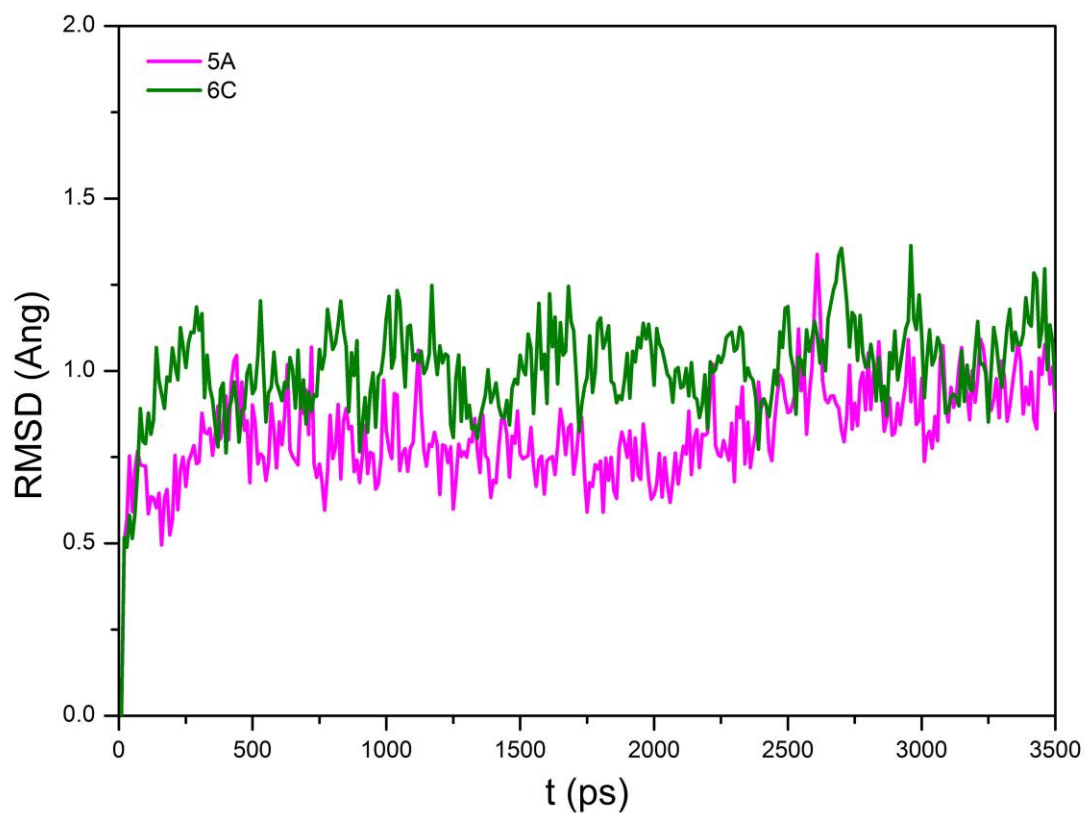

Figure S2. Root-mean-square displacement (RMSD) of the backbone  $C_{\alpha}$  atoms of the binding pocket residues for the ROCK1/inhibitor complexes (5A and 6C) with respect to the first snapshot as a function of time.
